# Supplementary material
Source: PubMed Central journal article supplement (PMC5842896)

# Western Blots\_Figure 2a

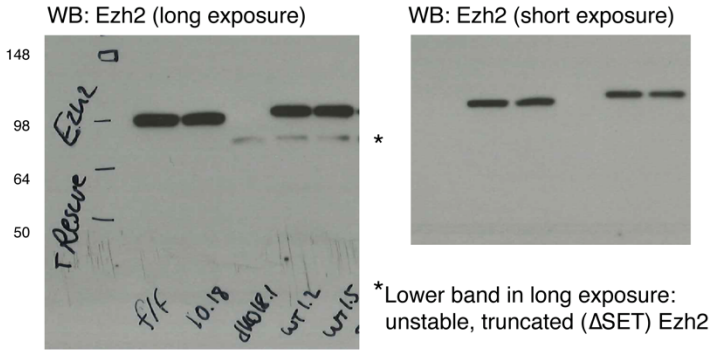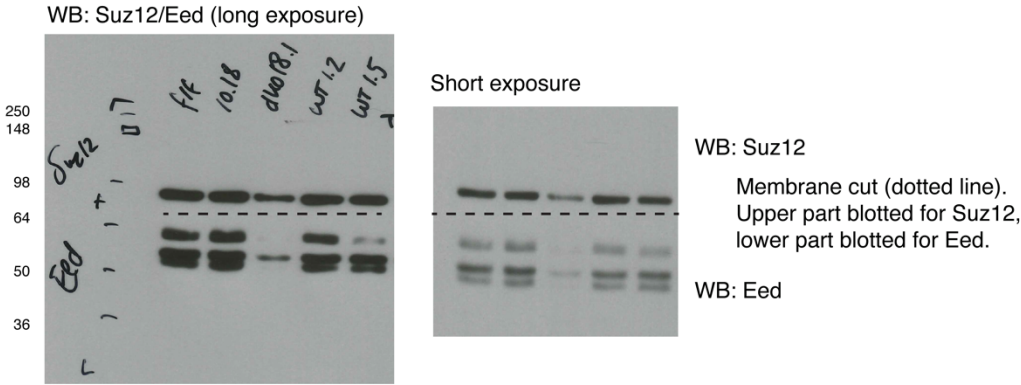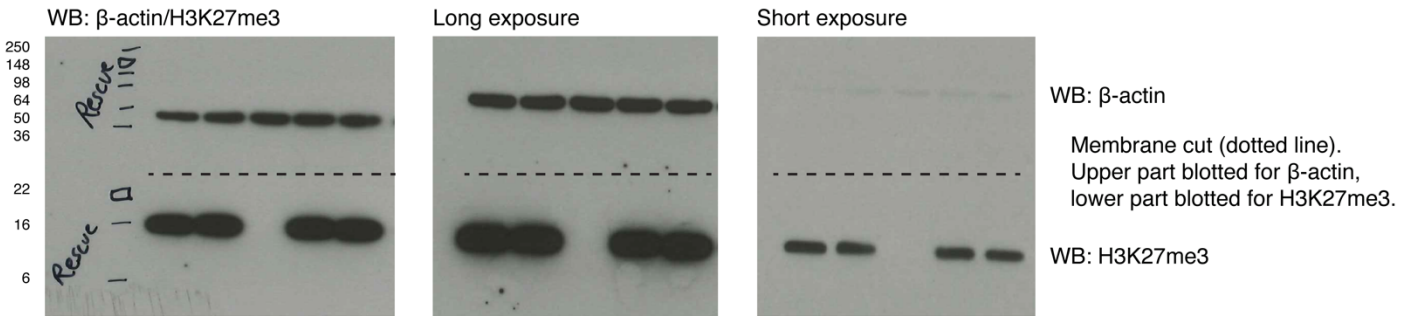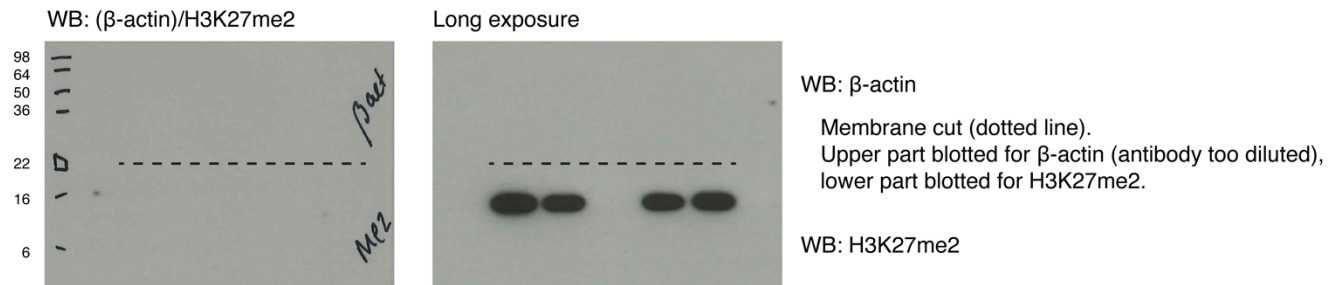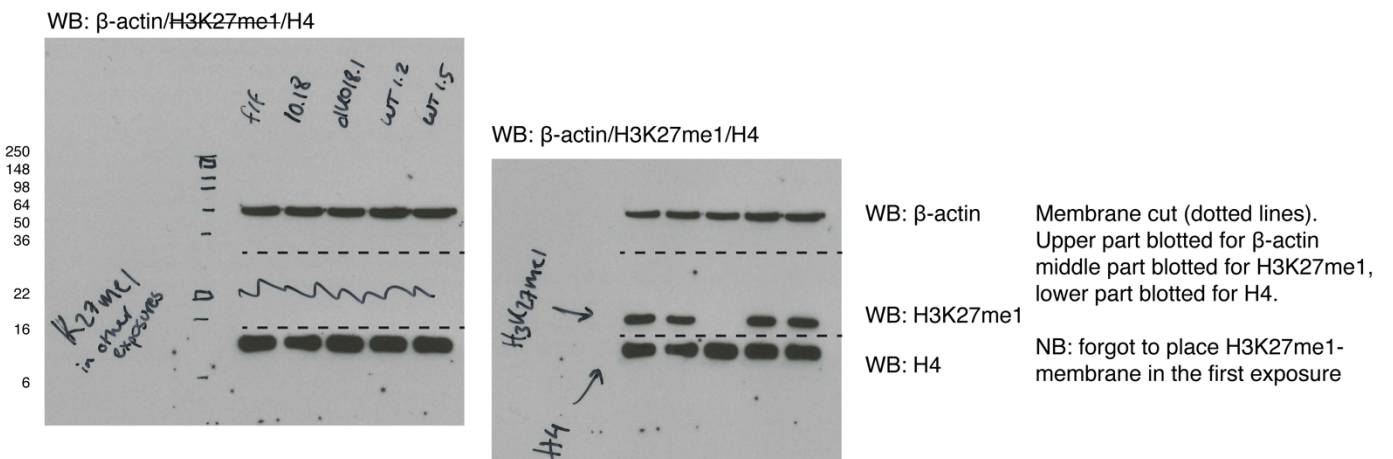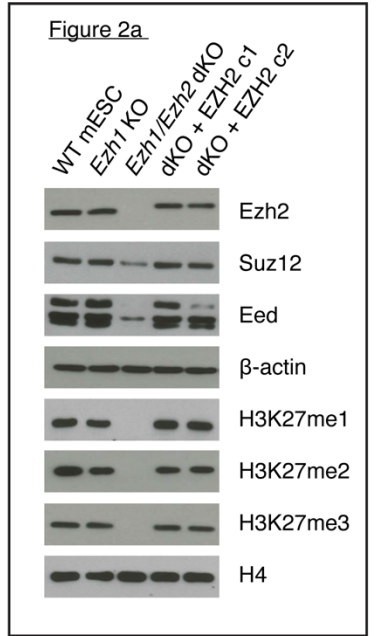

# Western Blots\_Figure 3a

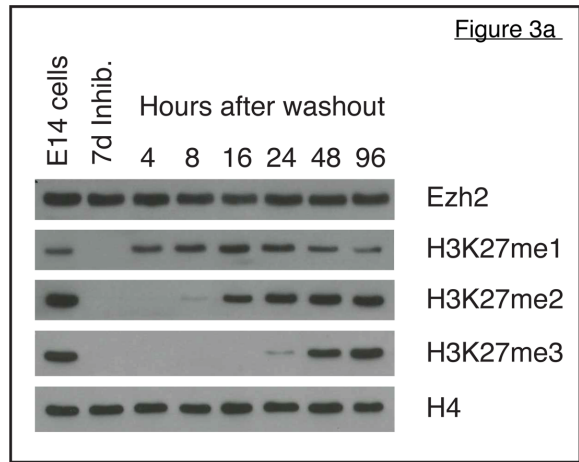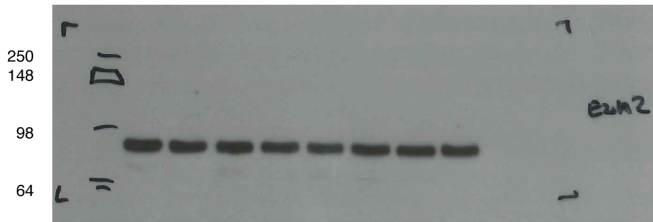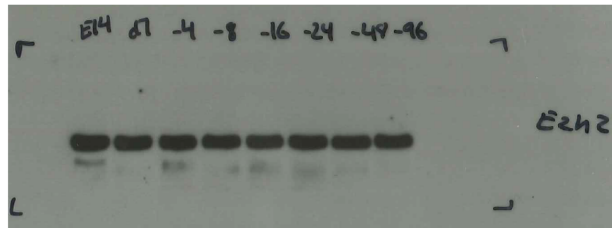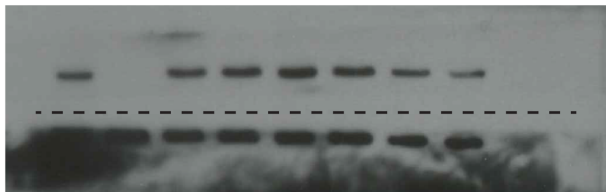

WB: H3K27me1

Membrane cut (dotted line).  
Upper part blotted for H3K27me1  
lower part blotted for H4.

WB: H4

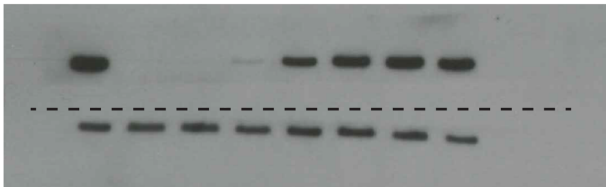

WB: H3K27me2

Membrane cut (dotted line).  
Upper part blotted for H3K27me2  
lower part blotted for H4.

WB: H4

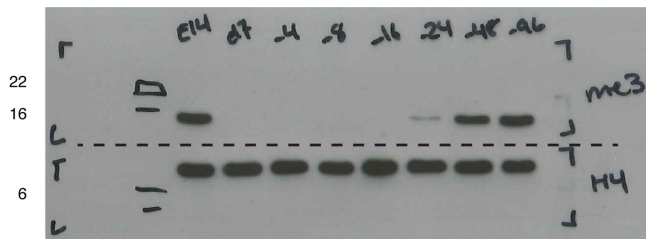

WB: H3K27me2

Membrane cut (dotted line).  
Upper part blotted for H3K27me3  
lower part blotted for H4

WB: H4

(this H4 blot is the one used in the figure).

# Western Blots\_Figure 5a

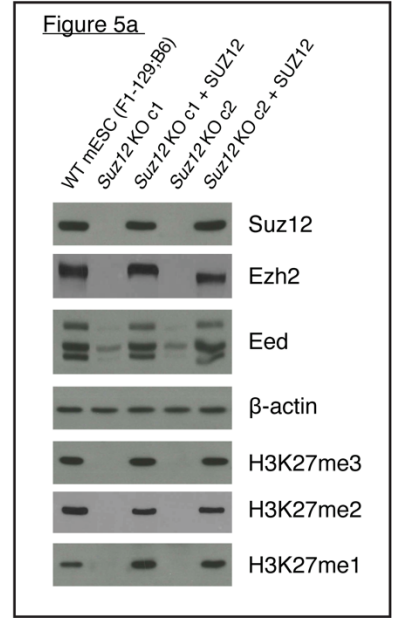

WB: Suz12/Eed

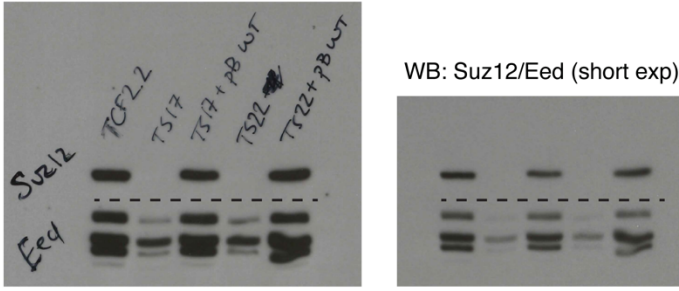

Membrane cut (dotted line). Upper part blotted for Suz12, lower part blotted for Eed.

WB: β-actin/H3K27me3/H3K27me1

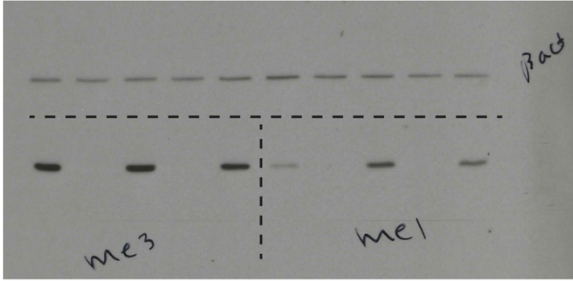

WB: β-actin/H3K27me3/H3K27me1

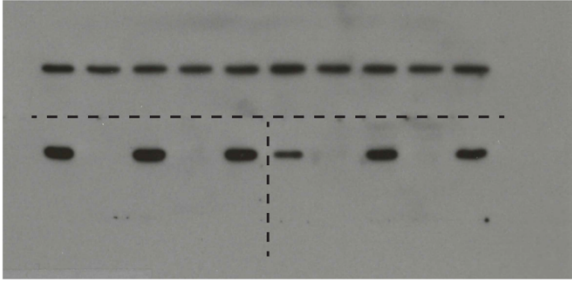

Membrane cut (dotted lines). Upper part blotted for β-actin, lower part blotted for H3K27me3 (left) and H3K27me1 (right).

WB: H3K27me2

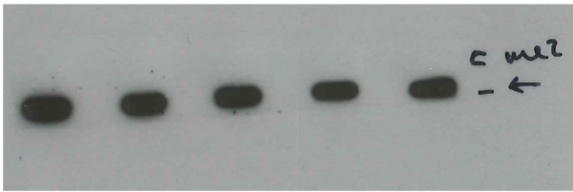

WB: H3K27me2

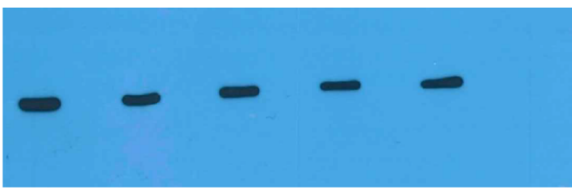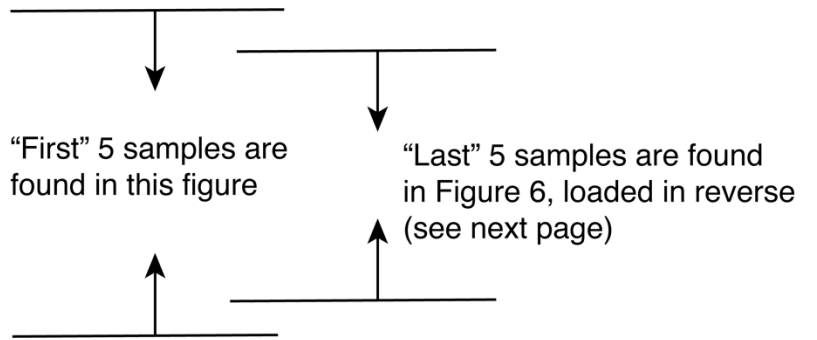

(WB: H4)

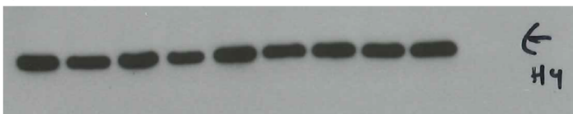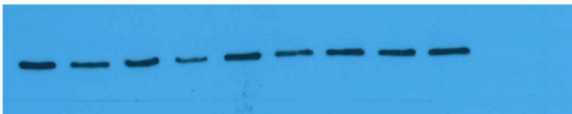

\*For H3K27me2 (and H4), the middle sample (*Suz12* KO c2 +SUZ12) is shared between the blots of Figures 5 (only H3K27me2 shown in this figure) and 6.

# Western Blots\_Figure 6b

WB: Suz12

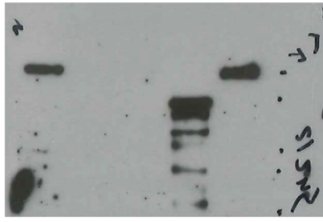

WB: Suz12

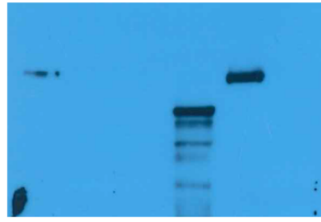

Epitope not present in VEFS domains

WB: Flag

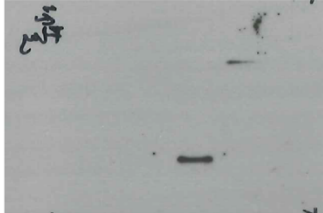

WB: Flag

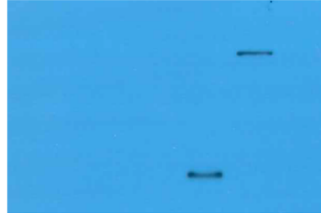

WB: Ezh2/Eed

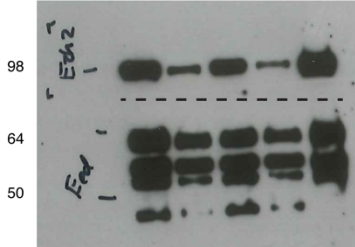

WB: Ezh2/Eed

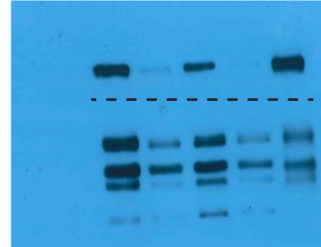

WB: Ezh2

Membrane cut (dotted line).  
Upper part blotted for Ezh2,  
lower part blotted for Eed.

WB: Eed

WB: β-actin

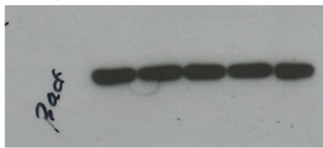

WB: β-actin

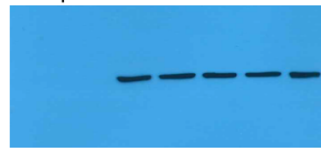

WB: H3K27me3

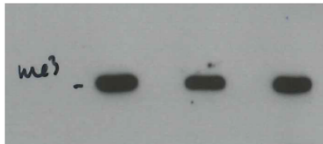

WB: H3K27me3

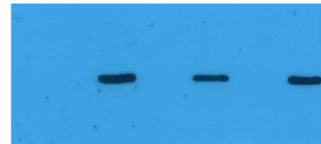

WB: H3K27me2

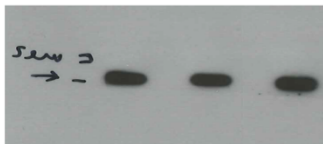

WB: H3K27me2

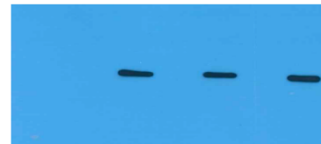

WB: H3K27me1

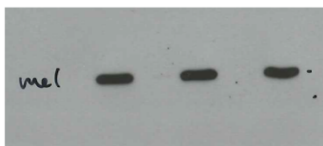

WB: H3K27me1

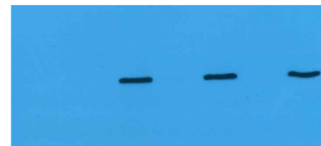

WB: H4

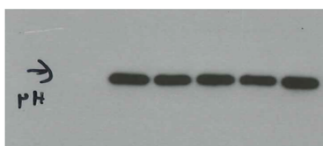

WB: H4

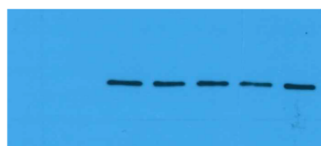

Figure 6b

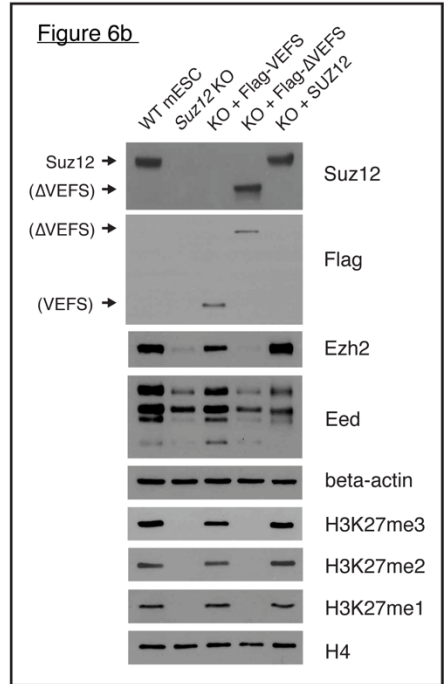

# Western Blots\_Figure S1a

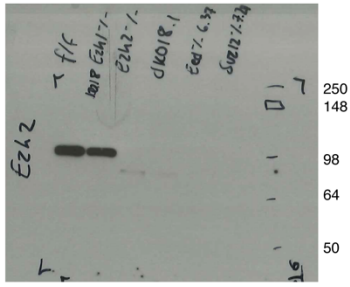

WB: Ezh1/Eed (long)

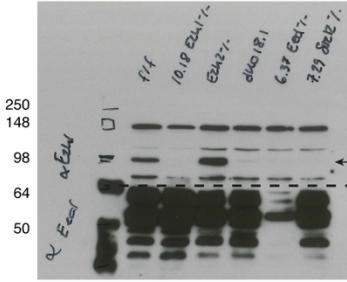

Membrane cut (dotted line).  
Upper part blotted for Ezh1 (arrow = Ezh1 \* = unspecific bands).  
Lower part blotted for Eed.

WB: Ezh1/Eed (medium)

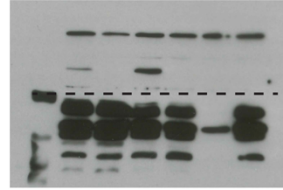

WB: Ezh1/Eed (short)

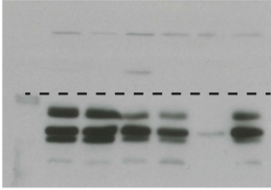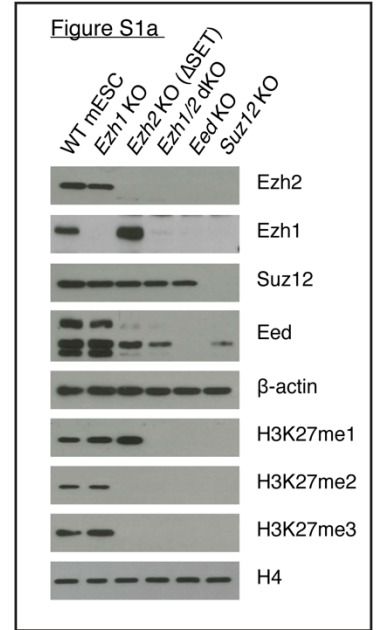

WB: Suz12

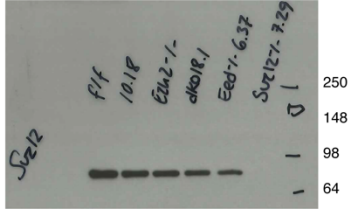

WB: Suz12/Eed

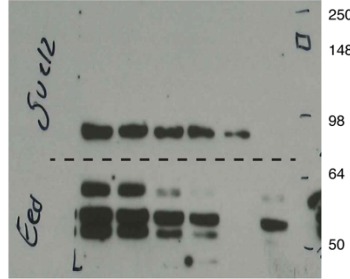

WB: Suz12

Second membrane cut (dotted line).  
Upper part blotted for Suz12,  
lower part blotted for Eed.

WB: Eed

WB: beta-actin/H3K27me3

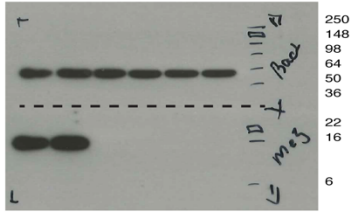

WB: H3K27me3

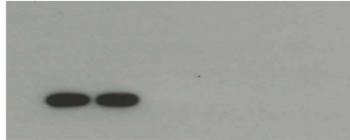

WB: beta-actin

First membrane cut (dotted line).  
Upper part blotted for beta-actin,  
lower part blotted for H3K27me3.

WB: H3K27me3

WB: H3K27me2 (short)

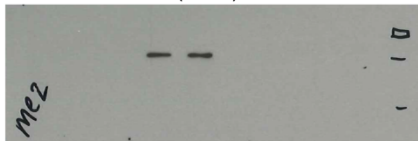

WB: H3K27me2 (long)

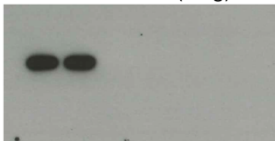

WB: Oct4/H3K27me1

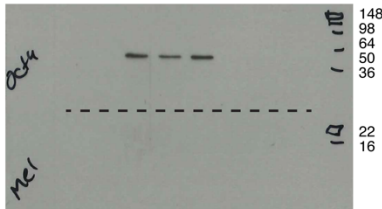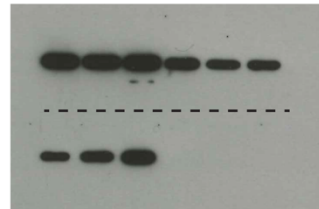

WB: Oct4

Membrane cut (dotted line).  
Upper part blotted for Oct4,  
lower part blotted for H3K27me1.

WB: H3K27me1

WB: H4

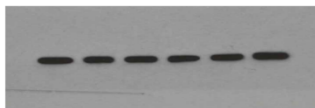

Supplement: NIHMS75815-supplement-Supplementary_Data_Set_1.pdf [file NIHMS75815-supplement-Supplementary_Data_Set_1.pdf]
