# Supplementary material
Source: PubMed Central journal article supplement (PMC5842896)
Supplement: NIHMS75815-supplement-Supplementary_Tables.pdf [file NIHMS75815-supplement-Supplementary_Tables.pdf]

**Table S1.**

Cell lines

| Wild type/parental cell lines   |                    |                                                    |                                                                                             |                                                    |                                                                                  |
|---------------------------------|--------------------|----------------------------------------------------|---------------------------------------------------------------------------------------------|----------------------------------------------------|----------------------------------------------------------------------------------|
| ID                              | Strain             | Genotype                                           | Comments                                                                                    |                                                    |                                                                                  |
| WT ( <i>Ezh2<sup>ff</sup></i> ) | B6                 | <i>Ezh2<sup>ff</sup>; Rosa26<sup>CreERT2</sup></i> | Parental line for <i>Ezh1</i> KO, <i>Ezh2</i> KO and <i>Ezh1/Ezh2</i> dKO                   |                                                    |                                                                                  |
| WT mESC (B6)                    | B6                 | WT                                                 | Parental line for <i>Suz12</i> KO, <i>Eed</i> KO                                            |                                                    |                                                                                  |
| WT mESC (129B6F1)               | 129B6F1            | WT                                                 | Parental line for <i>Suz12</i> KO                                                           |                                                    |                                                                                  |
| E14                             | 129                | WT                                                 | Used for EZH2 inhibitor experiments                                                         |                                                    |                                                                                  |
| PRC2 knockout cell line         |                    |                                                    |                                                                                             |                                                    |                                                                                  |
| ID                              | Clone ID           | Strain                                             | Targeting strategy                                                                          | Genotype                                           | Comments                                                                         |
| <i>Ezh2</i> KO                  |                    | B6                                                 | Cre/LoxP with loxP-sites flanking exons 16-19 of <i>Ezh2</i>                                | <i>Ezh2<sup>ΔA</sup>; Rosa26<sup>CreERT2</sup></i> | Knockout by 8+ days of OHT-treatment                                             |
| <i>Ezh1</i> KO                  | 10.18              | B6                                                 | CRISPR/Cas9n targeting of <i>Ezh1</i> in <i>Ezh2<sup>ff</sup>; Rosa26<sup>CreERT2</sup></i> | <i>Ezh1<sup>-/-</sup></i>                          | 1 <sup>st</sup> allele: 13 bp deletion<br>2 <sup>nd</sup> allele: 4 bp insertion |
| <i>Ezh1/Ezh2</i> dKO            | dKO18.1<br>dKO18.2 | B6                                                 | Cre/LoxP + CRISPR/Cas9n                                                                     | <i>Ezh1<sup>-/-</sup>; Ezh2<sup>ΔA</sup></i>       | Single cell-derived clones of OHT-treated 10.18                                  |
| <i>Suz12</i> KO                 | 7.29               | B6                                                 | CRISPR/Cas9n targeting of <i>Suz12</i> in C57B6 WT                                          | <i>Suz12<sup>-/-</sup></i>                         | 1 <sup>st</sup> allele: 58 bp deletion<br>2 <sup>nd</sup> allele: 17 bp deletion |
|                                 | c1 (TS17)          | 129B6F1                                            | CRISPR/Cas9n targeting of <i>Suz12</i> in                                                   | <i>Suz12<sup>-/-</sup></i>                         | 1 <sup>st</sup> allele: 28 bp deletion<br>2 <sup>nd</sup> allele: 43 bp deletion |
|                                 | c2 (TS22)          | 129B6F1                                            | TCF2.2                                                                                      | <i>Suz12<sup>-/-</sup></i>                         | 1 <sup>st</sup> allele: 17 bp deletion<br>2 <sup>nd</sup> allele: 40 bp deletion |
| <i>Eed</i> KO                   | 6.37               | B6                                                 | CRISPR/Cas9n targeting of <i>Eed</i> in C57B6 WT                                            | <i>Eed<sup>-/-</sup></i>                           | 1 <sup>st</sup> allele: 20 bp deletion<br>2 <sup>nd</sup> allele: 38 bp deletion |

**Table S2.**

gRNA sequences for CRISPR/Cas9

| Genomic target |        | Guide A              | Guide B              |
|----------------|--------|----------------------|----------------------|
| <i>Ezh1</i>    | Exon 6 | GAGCTGATCAATAACTATGA | TTCACCTCGTCACCCATGTA |
| <i>Suz12</i>   | Exon 7 | ACGAGTAGGACTTCACCATA | CTGTTTAGAGTAACTCGTCC |
| <i>Eed</i>     | Exon 8 | AAGAGAGTGATCCATACCAC | TGTGGAGAATCAACTCAAAG |

**Table S3.**  
Antibodies

| Target                       | ID         | Type         | Epitope                            | Applications    | Manufacturer   |
|------------------------------|------------|--------------|------------------------------------|-----------------|----------------|
| <b>PRC2</b>                  |            |              |                                    |                 |                |
| Ezh1                         | N22.7      | Mouse mAb    | N-terminal                         | WB              | Helin lab      |
| Ezh2                         | BD43       | Mouse mAb    | N-terminal                         | WB              | Helin lab      |
|                              | D2C9       | Rabbit mAb   | App. aa340-360                     | ChIP            | Cell Signaling |
| Eed                          | AA19.30    | Mouse mAb    |                                    | WB              | Helin lab      |
| Suz12                        | D39F6      | Rabbit mAb   | Around aa260                       | WB, IP,<br>ChIP | Cell Signaling |
| <b>Histone modifications</b> |            |              |                                    |                 |                |
| H3K27me3                     | C36B11     | Rabbit mAb   |                                    | WB, ChIP        | Cell Signaling |
| H3K27me2                     | D18C8      | Rabbit mAb   |                                    | WB, ChIP        | Cell Signaling |
|                              | MABI0321   | Mouse mAb    |                                    | WB              | Takara         |
| Pan-H4                       |            | Rabbit pAb   |                                    | WB              | Millipore      |
| <b>Tags and controls</b>     |            |              |                                    |                 |                |
| Flag                         | M2         | Mouse mAb    | DYKDDDDK                           | ChIP            | Sigma          |
|                              | SAB1306078 | Rabbit pAb   |                                    | WB              | Sigma          |
| $\beta$ -actin               | ab8226     | Mouse mAb    |                                    | WB              | Abcam          |
| IgG                          |            | Mouse/Rabbit | IgG isolated from pre-immune serum | IP, ChIP        | Sigma          |

**Table S4.**

Primer sequences for ChIP-qPCR analysis

|               | <b>Forward primer</b> | <b>Reverse primer</b> |
|---------------|-----------------------|-----------------------|
| <i>Dclk1</i>  | TTCCTCGAAAGACGGCTGCT  | TTCCTGGCCGGACCAAATA   |
| <i>Pmp22</i>  | AGCCACCATGCTCCTACTCT  | GAAGAGCAACTAGCACCG    |
| <i>Col4a1</i> | ACGGGAGCCTGTAATGTTTG  | TCAGAGCCTGTGAAGTGTTG  |
| <i>Ctsh</i>   | TCCCACGTTGGAAGGTTAAG  | TTCTTGACGAATGCAACAGC  |
| <i>Hibadh</i> | CATTCTCTCACAGCCCCCAG  | TTGCTGAGTTGCGCATGTCT  |
| <i>Med1</i>   | CACACCAGATTCACACCAG   | CTGTGCCTGTGCCACTAGAA  |
| <i>Utp6</i>   | TCTATGGCCTTACCCACTGC  | TGACACGTTTCTGCTTCCAG  |

**Table S5.**

Primer sequences for RT-qPCR analysis

|               | <b>Forward primer</b>  | <b>Reverse primer</b>  |
|---------------|------------------------|------------------------|
| <i>Pou5f1</i> | CAGCAGATCACTCACATCGCCA | GCCTCATACTCTTCTCGTTGGG |
| <i>Nanog</i>  | GAACGCCTCATCAATGCCTGCA | GAATCAGGGCTGCCTTGAAGAG |
| <i>Klf4</i>   | CTATGCAGGCTGTGGCAAACC  | TTGCGGTAGTGCCTGGTCAGTT |
| <i>Sox2</i>   | AACGGCAGCTACAGCATGATGC | CGAGCTGGTCATGGAGTTGTAC |
| <i>Hoxa10</i> | AGTCCTAGACTCCACGCCAC   | GAACTGCCAGGGAGTCCTTC   |
| <i>Rplpo</i>  | TTCATTGTGGGAGCAGAC     | CAGCAGTTTCTCCAGAGC     |
